# Supplementary material for: Single-Cell RNA Analysis of Type I Spiral Ganglion Neurons Reveals a Lmx1a Population in the Cochlea
Source: PubMed Central journal article supplement (PMC7261882; doi:10.3389/fnmol.2020.00083), 2020-05-25

# Supplementary 1 (related to Fig. 1)

**A.**

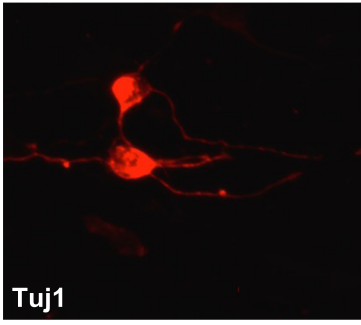

**B.**

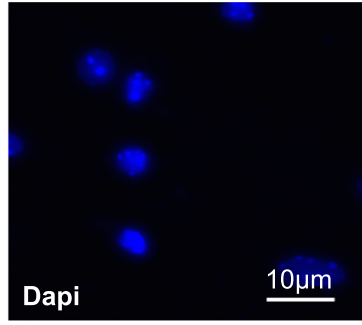

**C.**

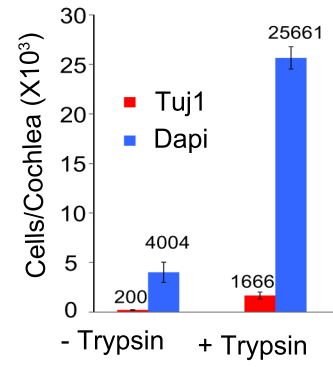

**D.**

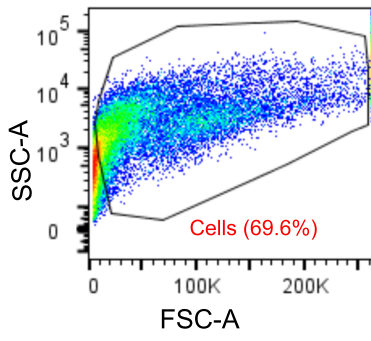

**E.**

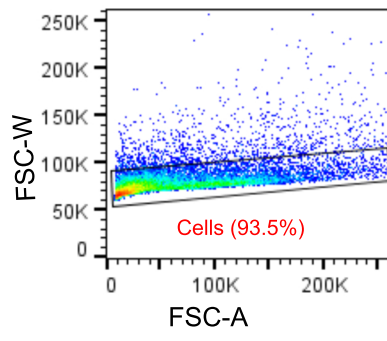

**F.**

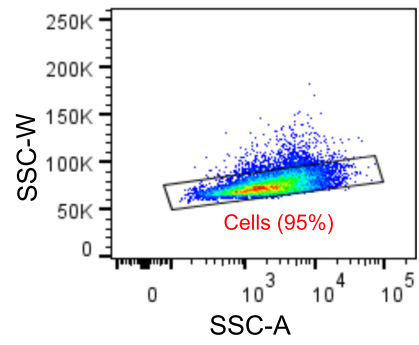

**G.**

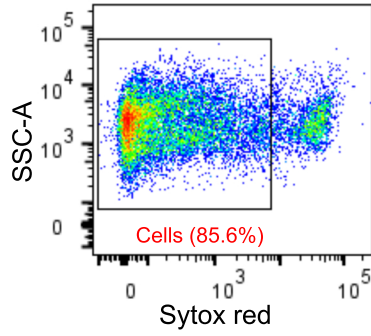

**H.**

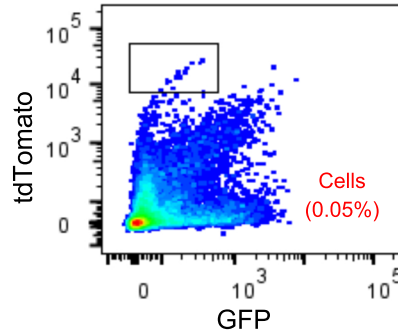

Supplementary Figure 2 (related to Figure 2)

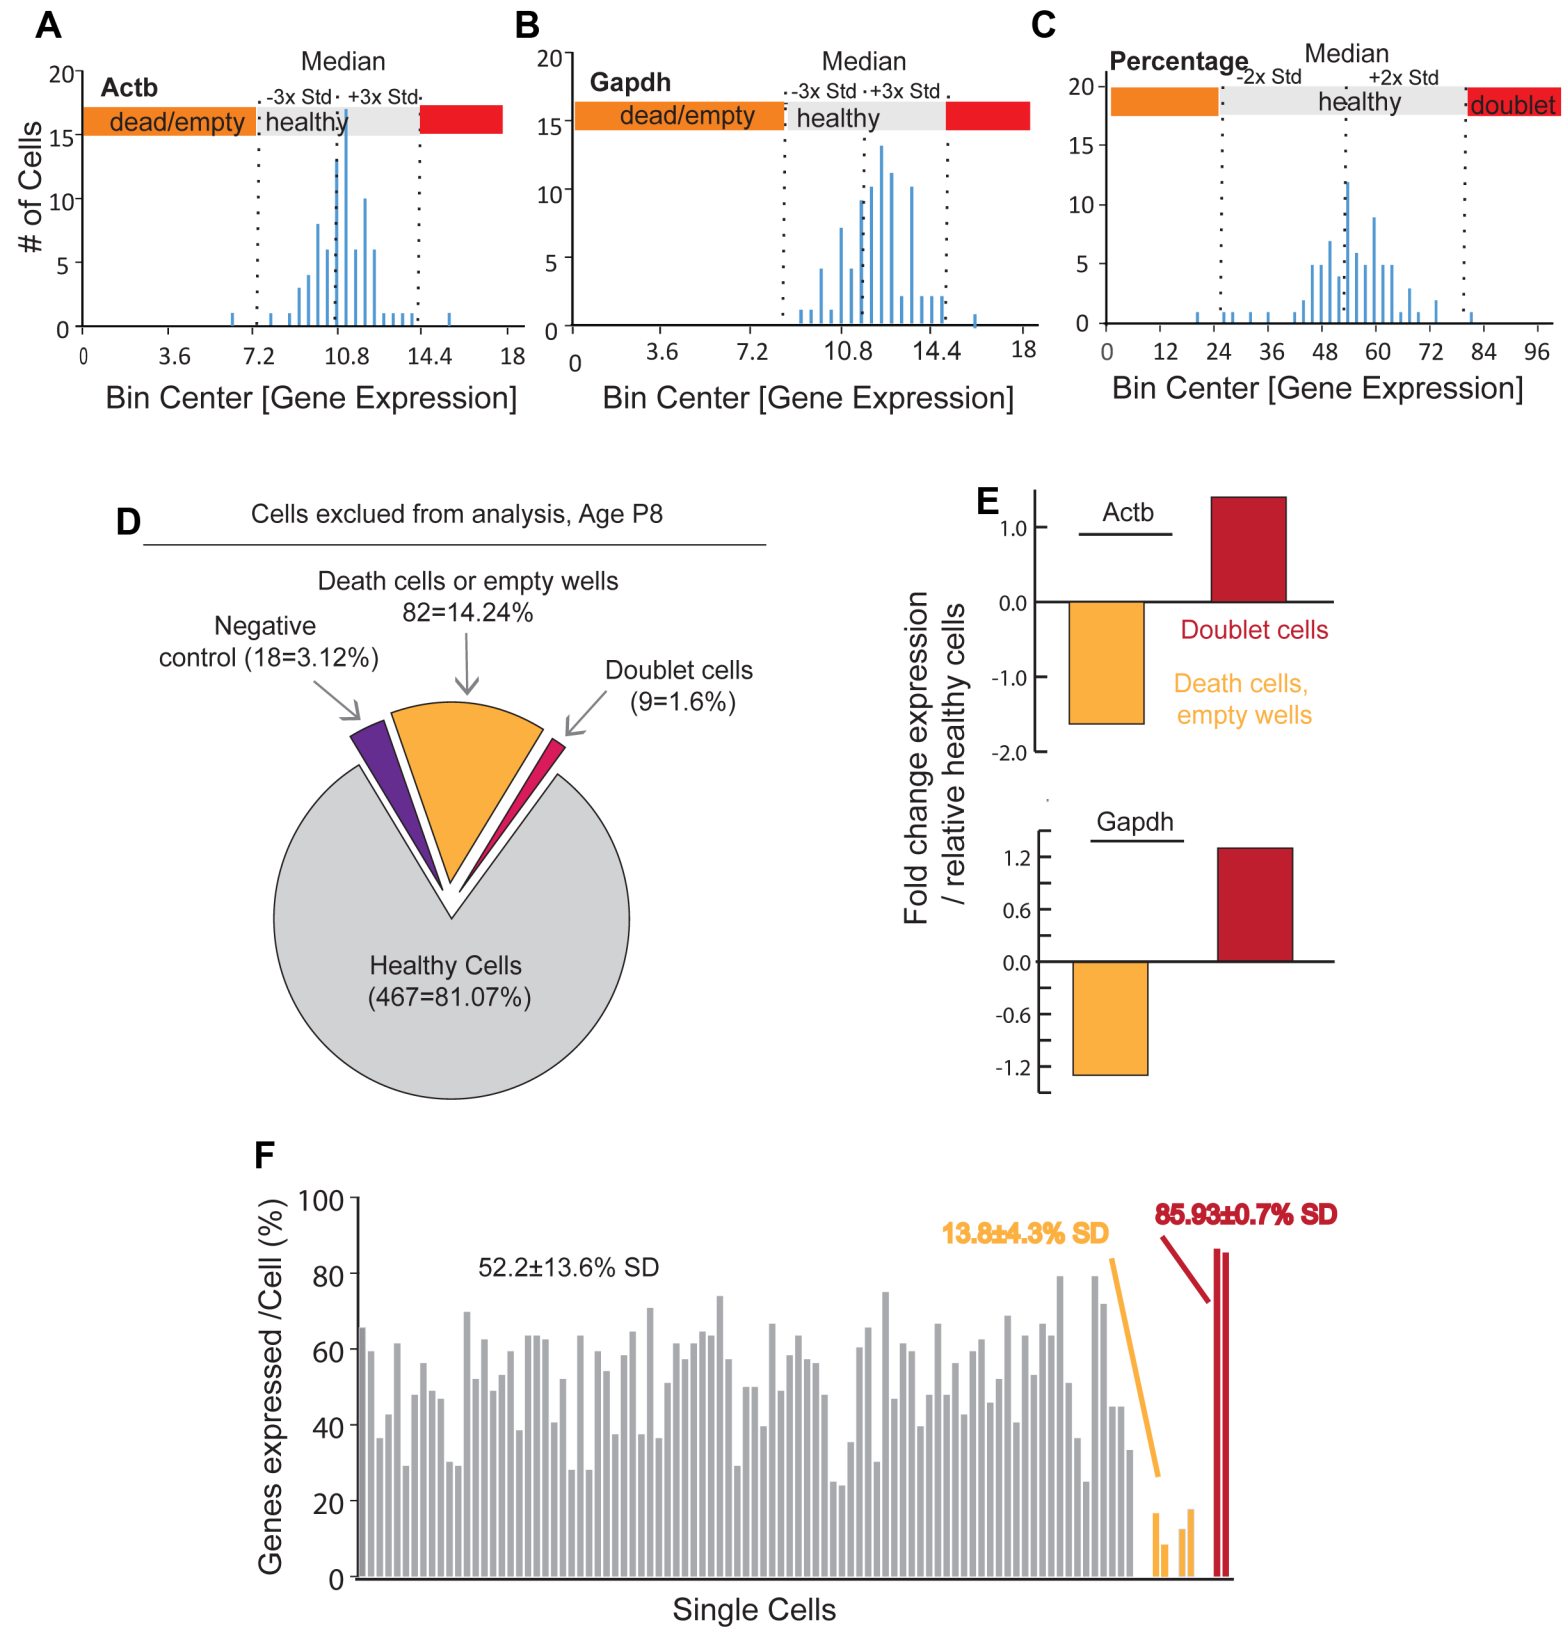

# Supplementary Figure 3 (related to Figure 3&4)

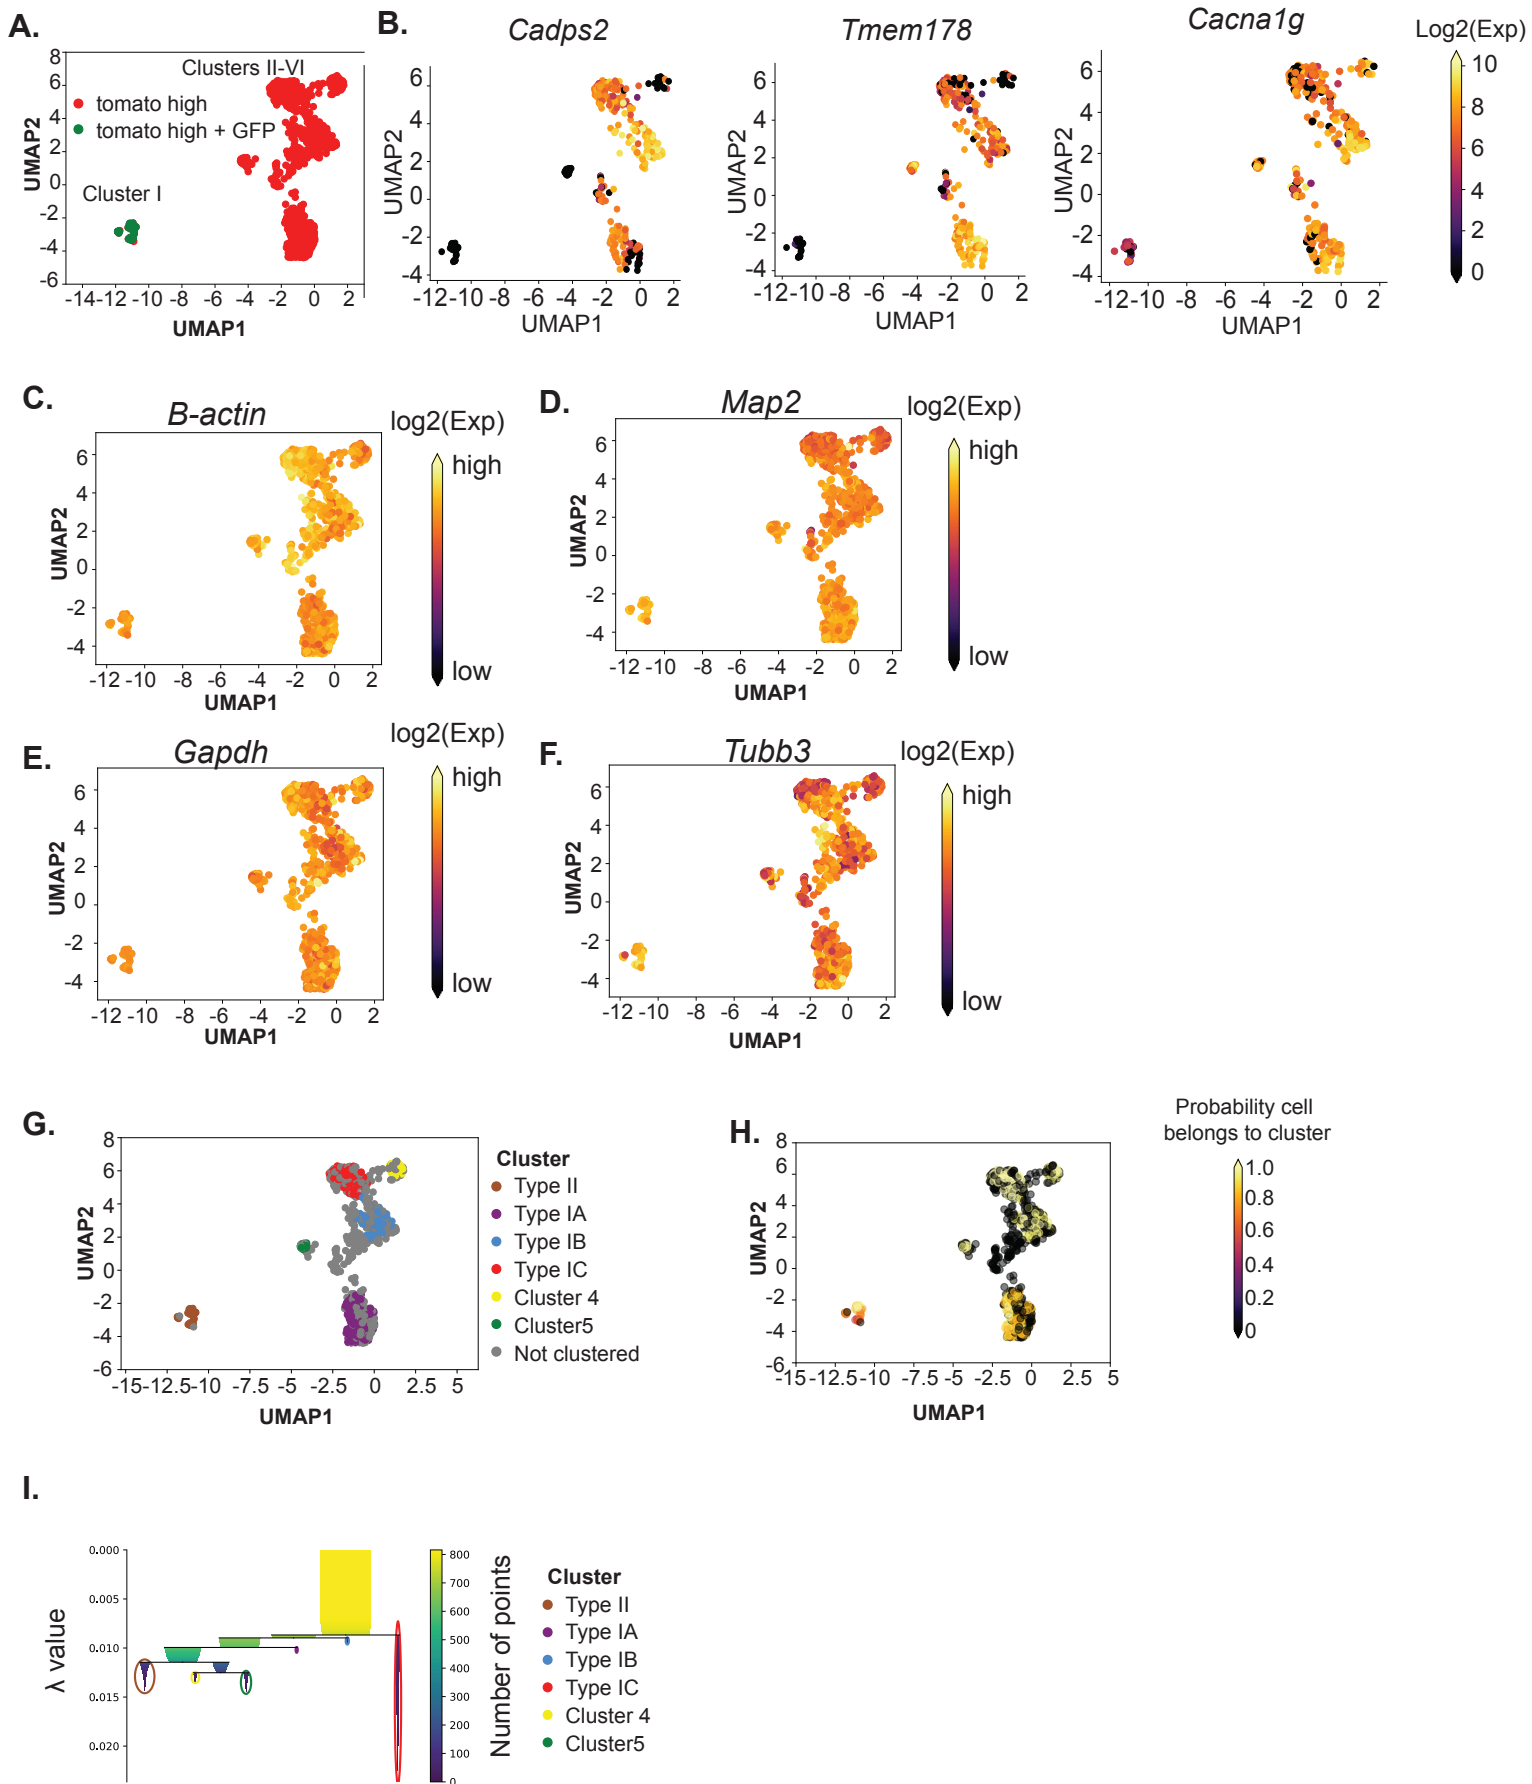

Supplementary Figure 4 (related to Figure 3)

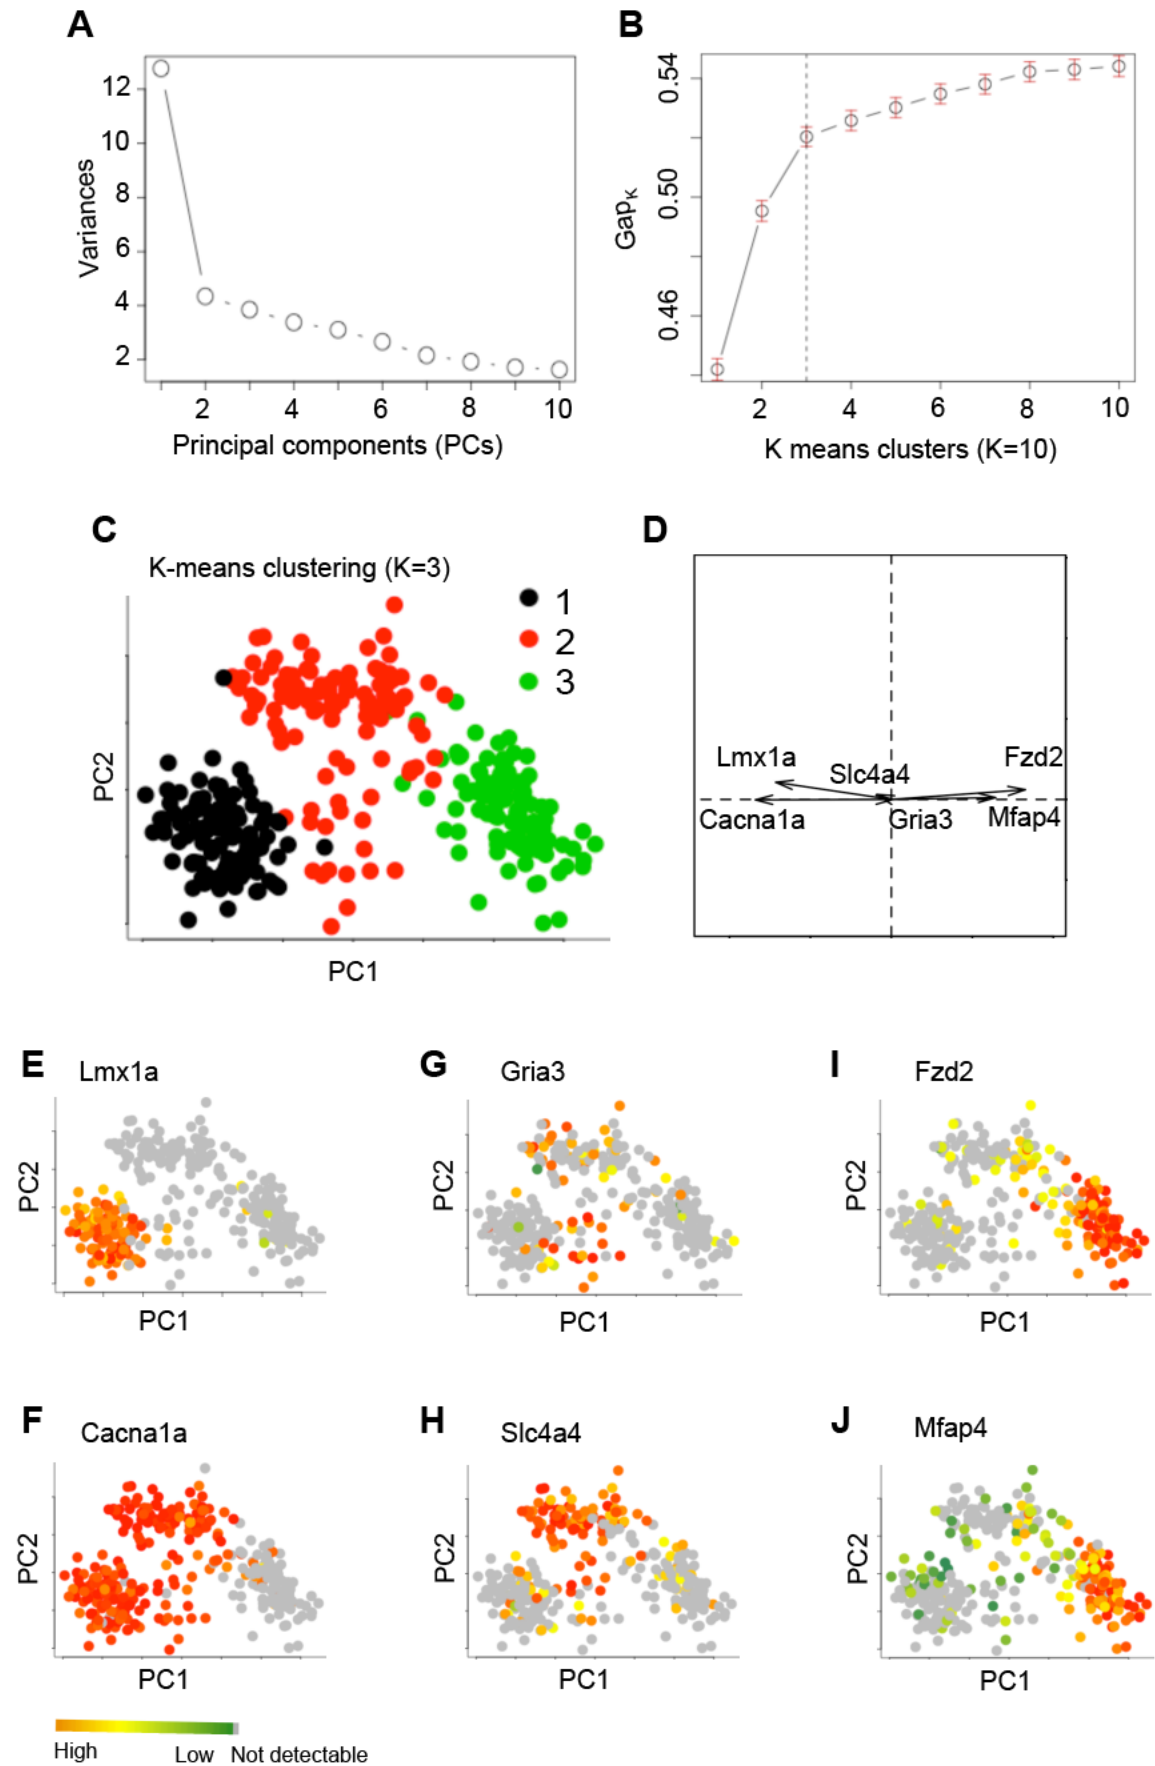



Supplementary Figure 5 (related to Figure 3)

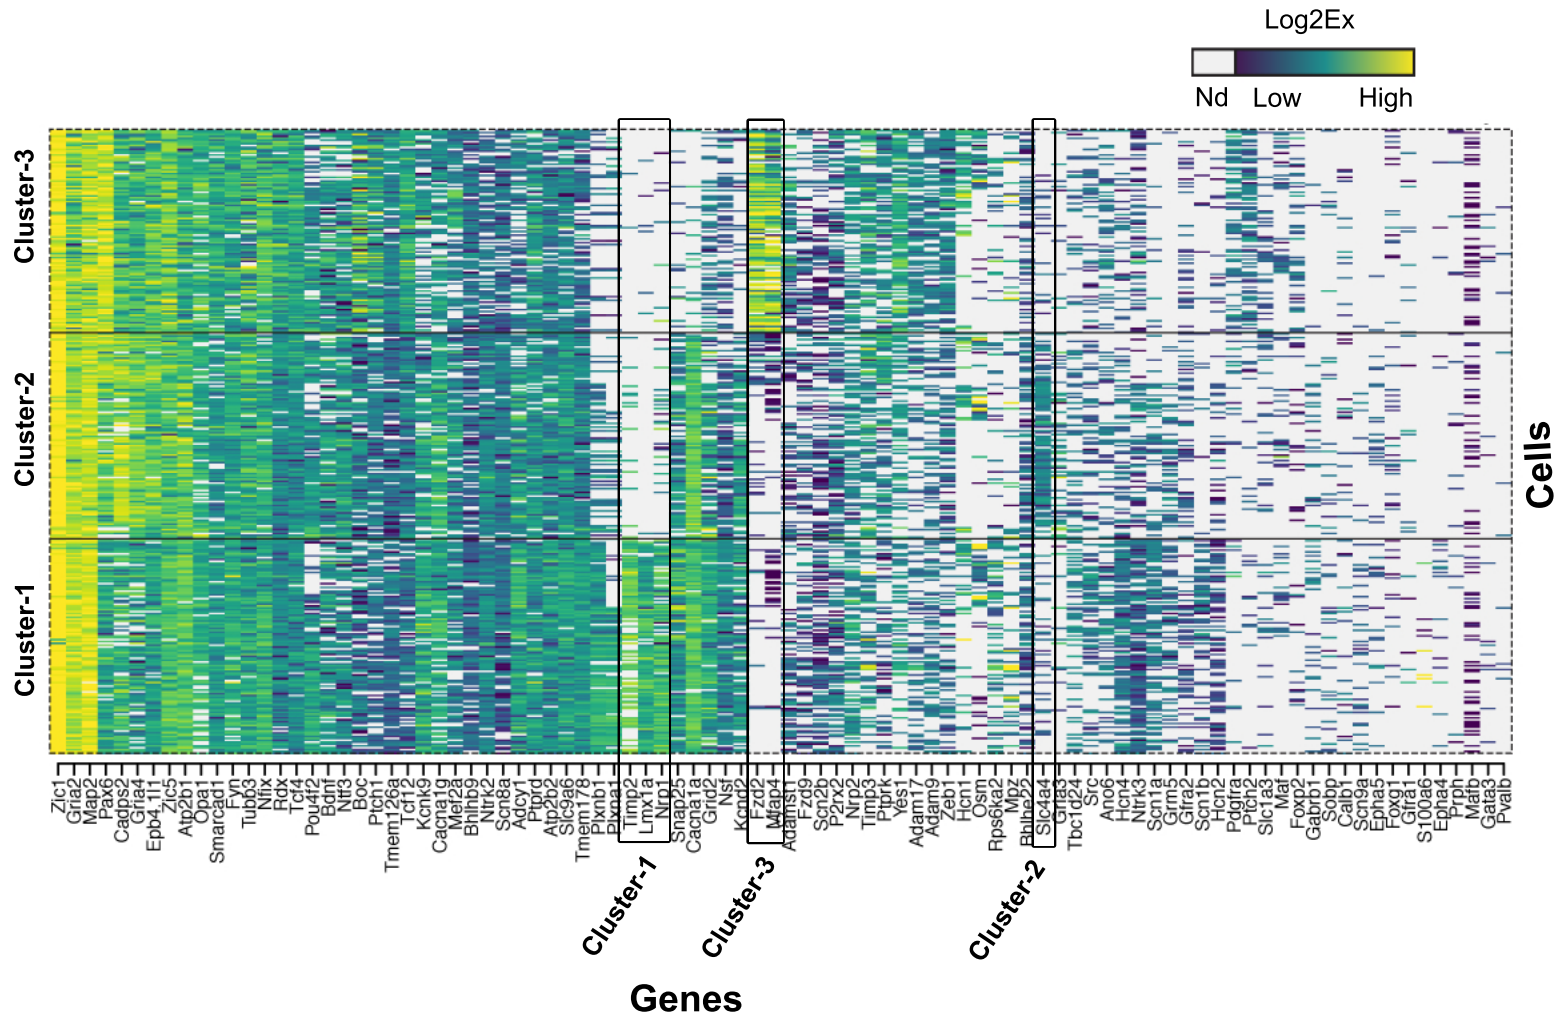

**A. Transcription Factors**

**Signaling**

**Physiology**

**Guidance and Adhesion**

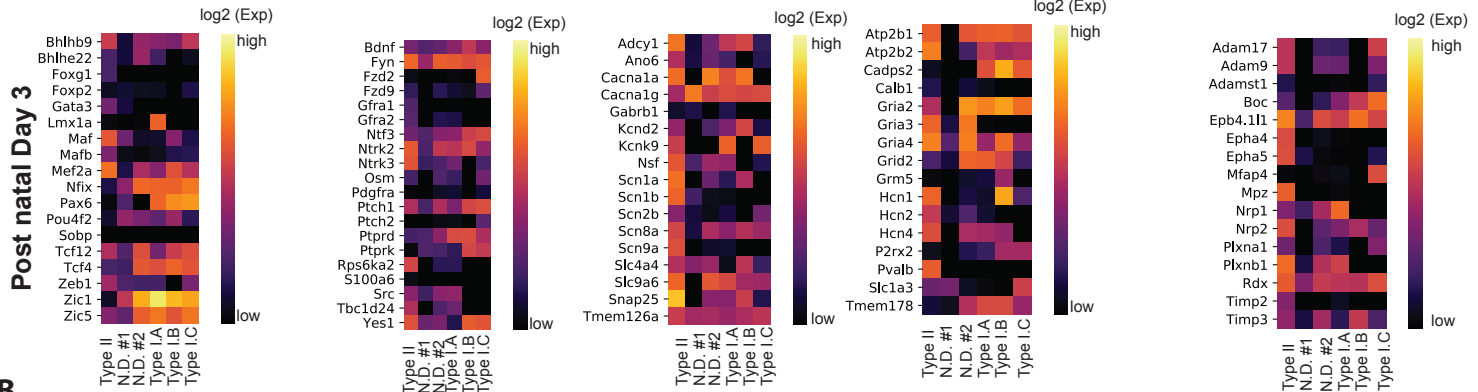

**B.**

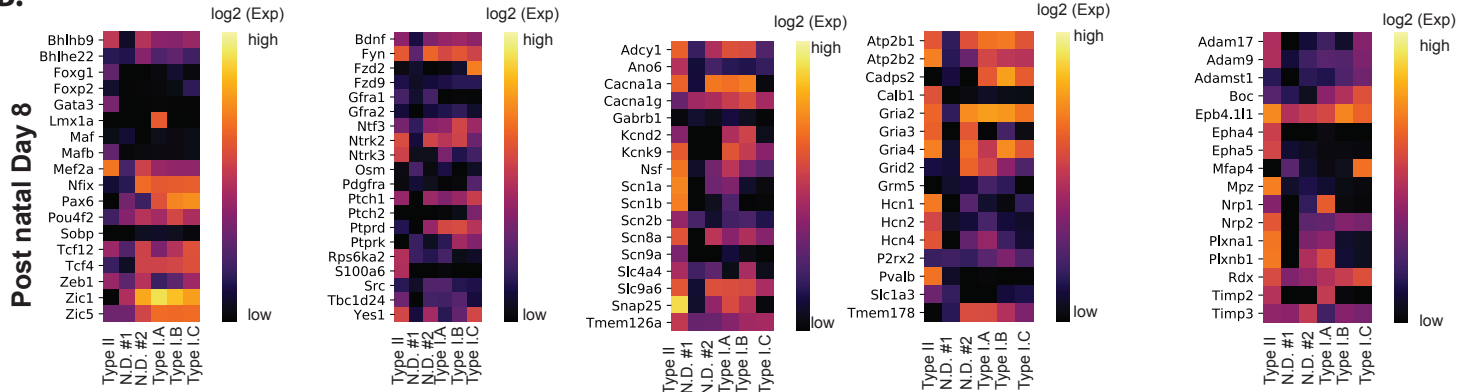

**C.**

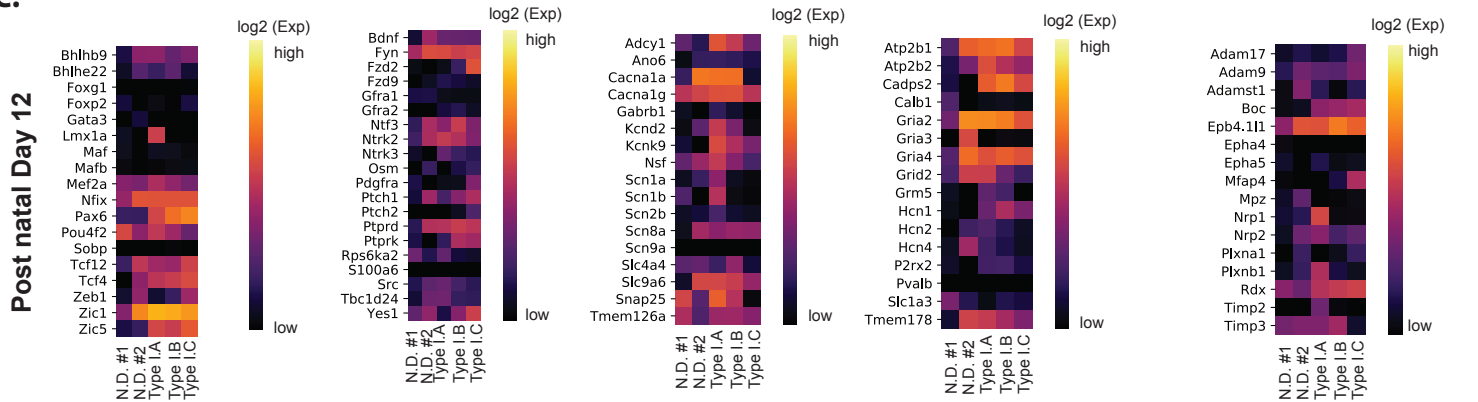

**D.**

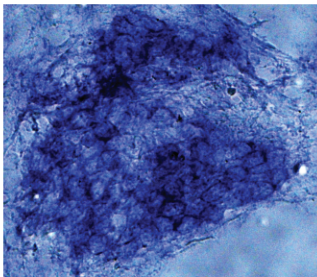

P3 *Cacna1a*

**E.**

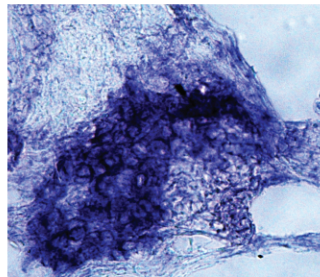

P8 *Cacna1a*

**F.**

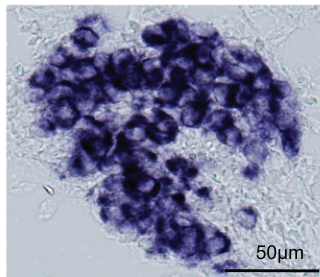

P8 *Nefm*

# Supplemental Figure 7

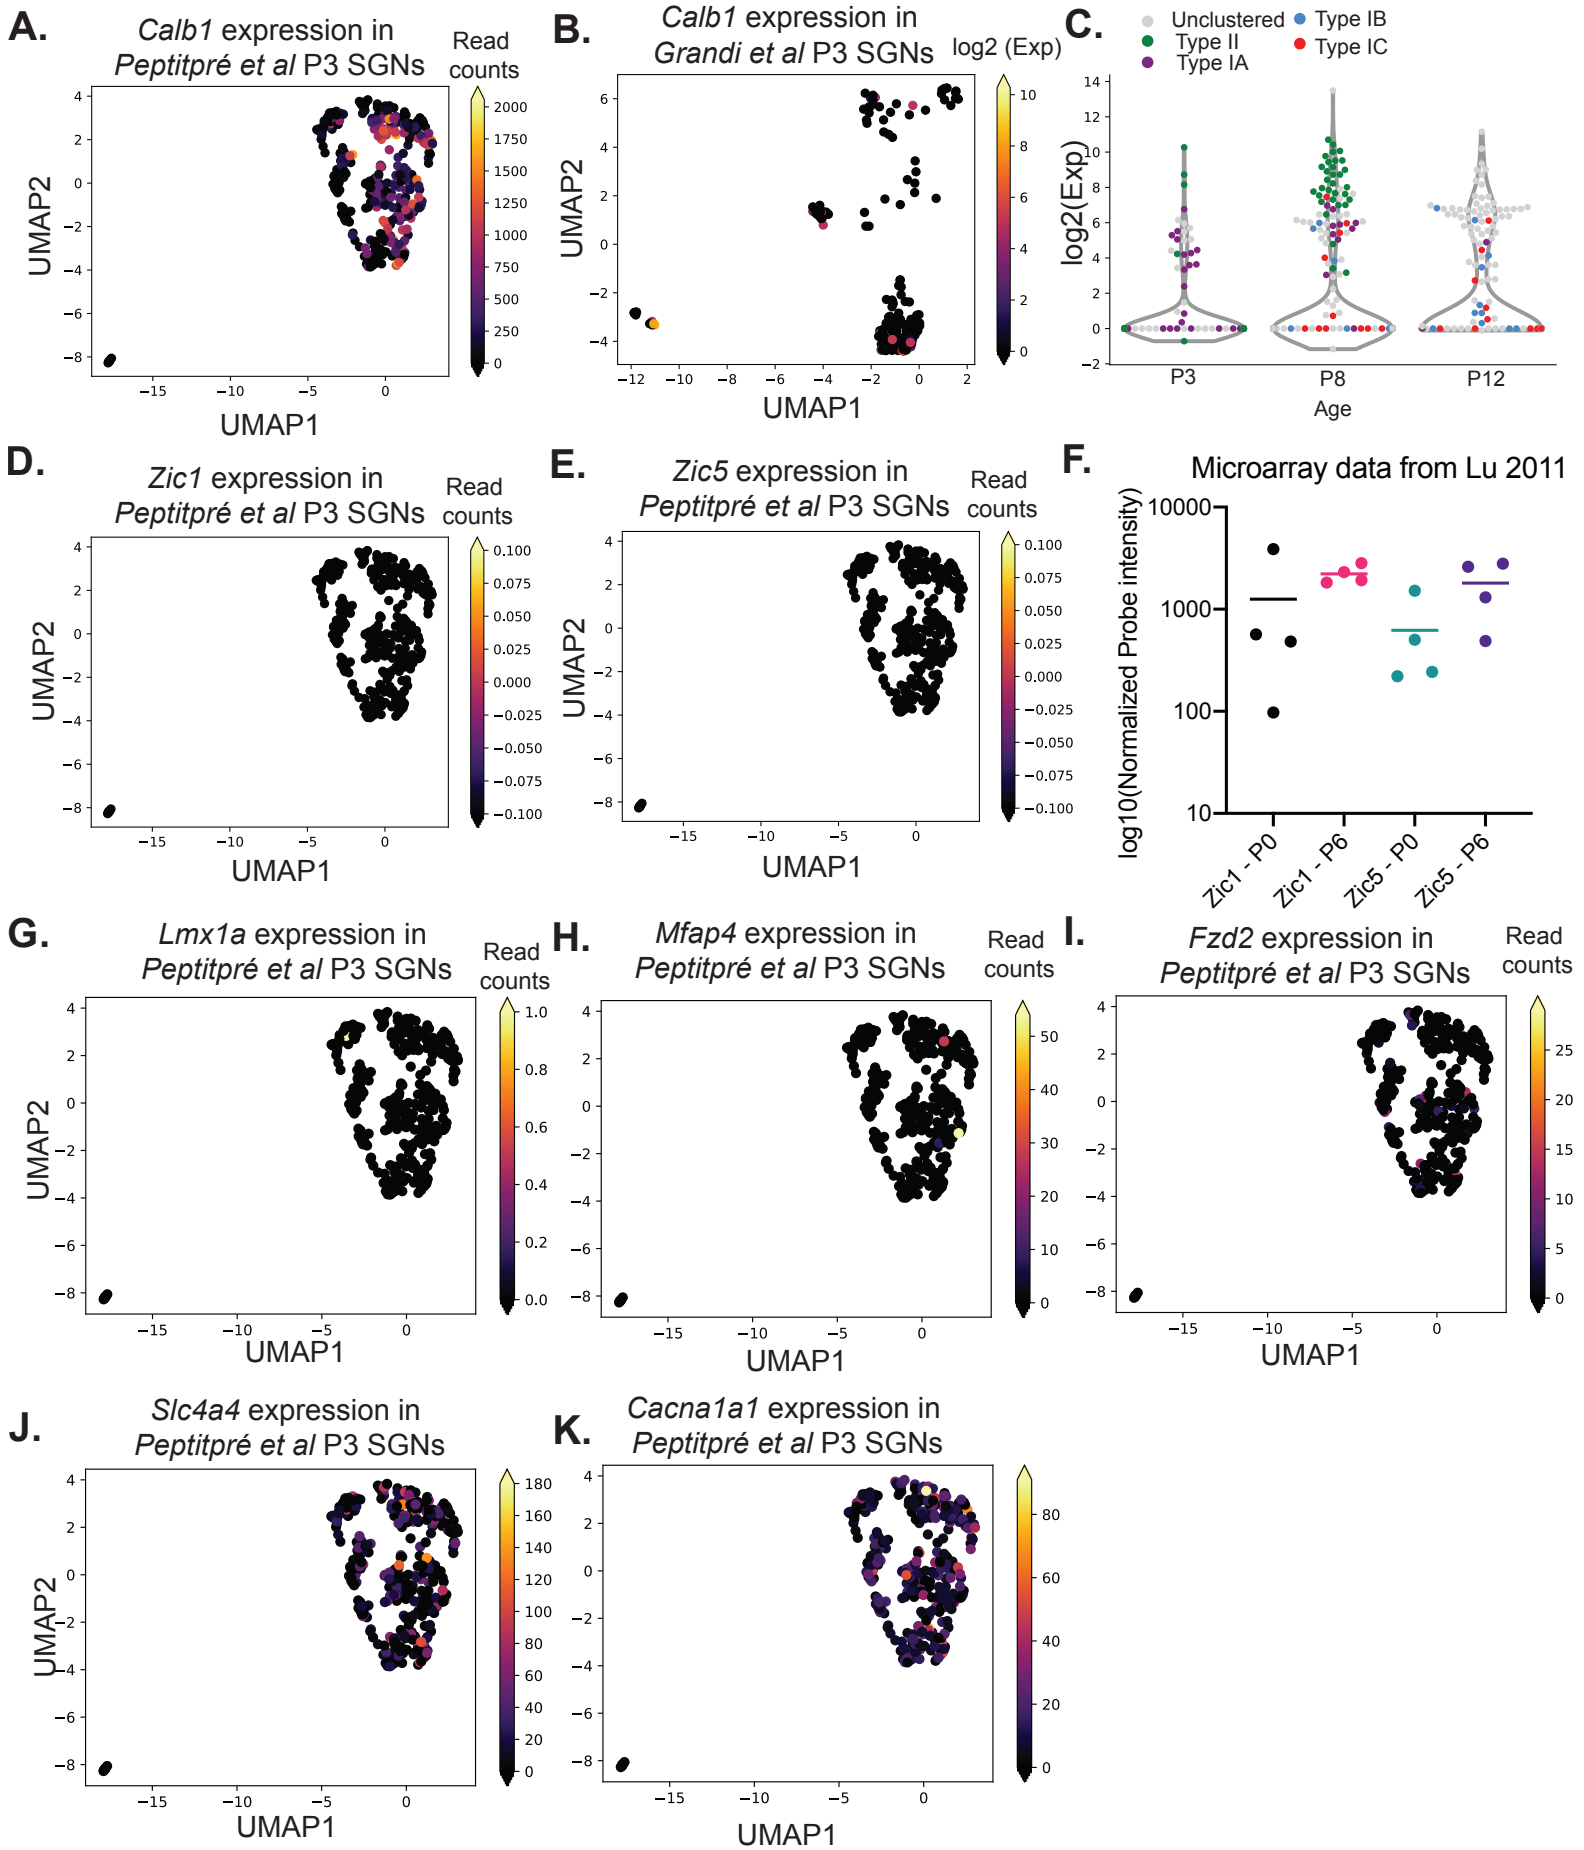

Supplement: Data_Sheet_1.pdf [file Data_Sheet_1.pdf]
